# Supplementary material for: An Analysis of the Serum Metabolomic Profile for the Radiomitigative Effect of the Thrombopoietin Receptor Agonist Romiplostim in Lethally Whole-Body-Irradiated Mice
Source: MDPI journal article supplement (doi:10.3390/metabo12020161), 2022-02-08
Supplement: s1 [file s1]

**Supplementary Table S1.** TBI-induced metabolic pathway dysregulation.

| name                                        | Total(Hit) | -LOG <sub>10</sub> (p) | Impact  | Expected |
|---------------------------------------------|------------|------------------------|---------|----------|
| Histidine metabolism                        | 16(2)      | 2.3435                 | 0.18852 | 0.10624  |
| Pyrimidine metabolism                       | 39(2)      | 1.5884                 | 0.06491 | 0.25896  |
| Tryptophan metabolism                       | 41(2)      | 1.5475                 | 0.24798 | 0.27224  |
| Aminoacyl-tRNA biosynthesis                 | 48(2)      | 1.4198                 | 0       | 0.31873  |
| Arginine biosynthesis                       | 14(1)      | 1.0485                 | 0       | 0.092961 |
| Nicotinate and nicotinamide metabolism      | 15(1)      | 1.0199                 | 0       | 0.099602 |
| Pantothenate and CoA biosynthesis           | 19(1)      | 0.9224                 | 0       | 0.12616  |
| beta-Alanine metabolism                     | 21(1)      | 0.8815                 | 0       | 0.13944  |
| Sphingolipid metabolism                     | 21(1)      | 0.8815                 | 0.0142  | 0.13944  |
| Alanine, aspartate and glutamate metabolism | 28(1)      | 0.7655                 | 0.22356 | 0.18592  |
| Cysteine and methionine metabolism          | 33(1)      | 0.7006                 | 0       | 0.21912  |
| Glycerophospholipid metabolism              | 36(1)      | 0.6666                 | 0.02423 | 0.23904  |
| Amino sugar and nucleotide sugar metabolism | 37(1)      | 0.6560                 | 0       | 0.24568  |

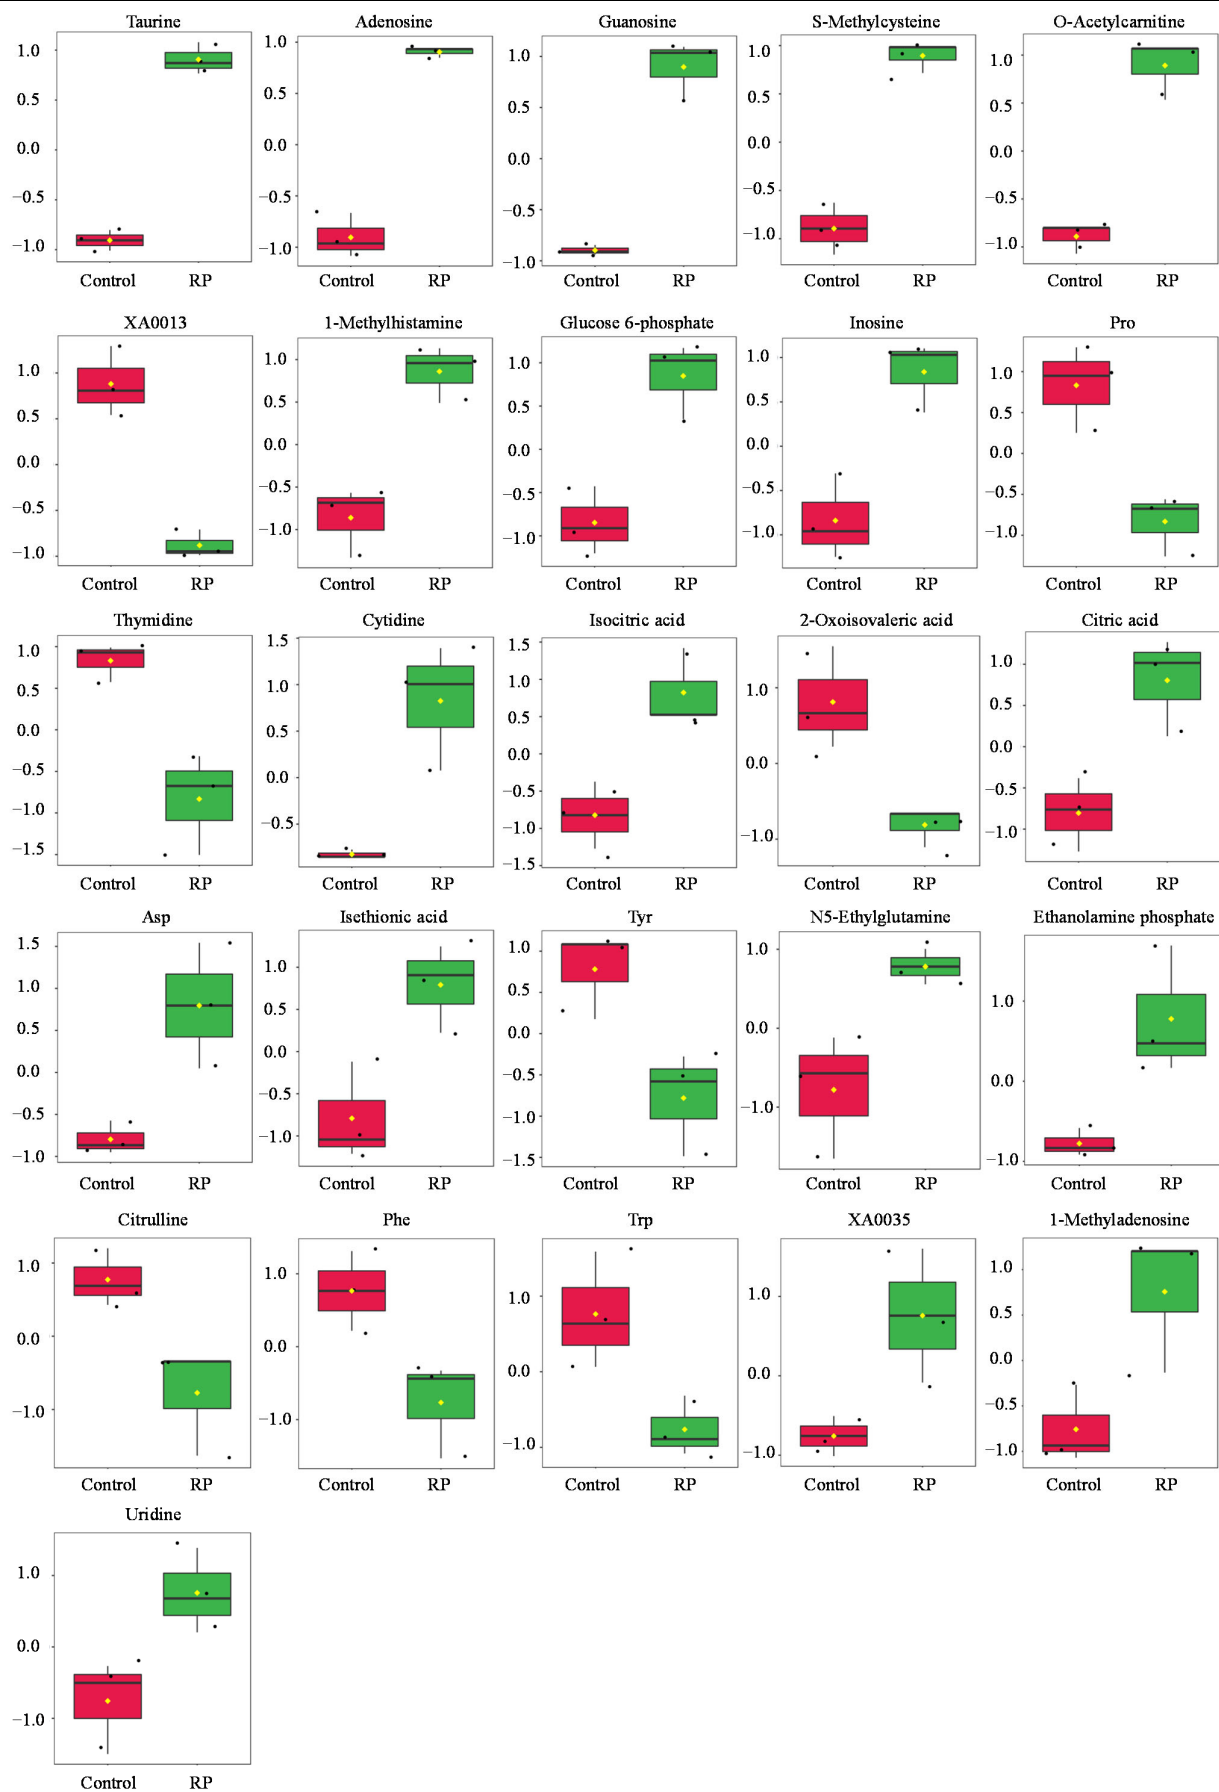

**Supplementary Figure S1** Effect of RP on the metabolic profile in serum. Boxplots of metabolite were presented. The black dots represent the normalized value of metabolite. The notch indicates 95% confidence interval around the median. Proline, Pro; Aspartate, Asp; Tyrosine, Tyr; Phenylalanine, Phe; Tryptophan, Trp.

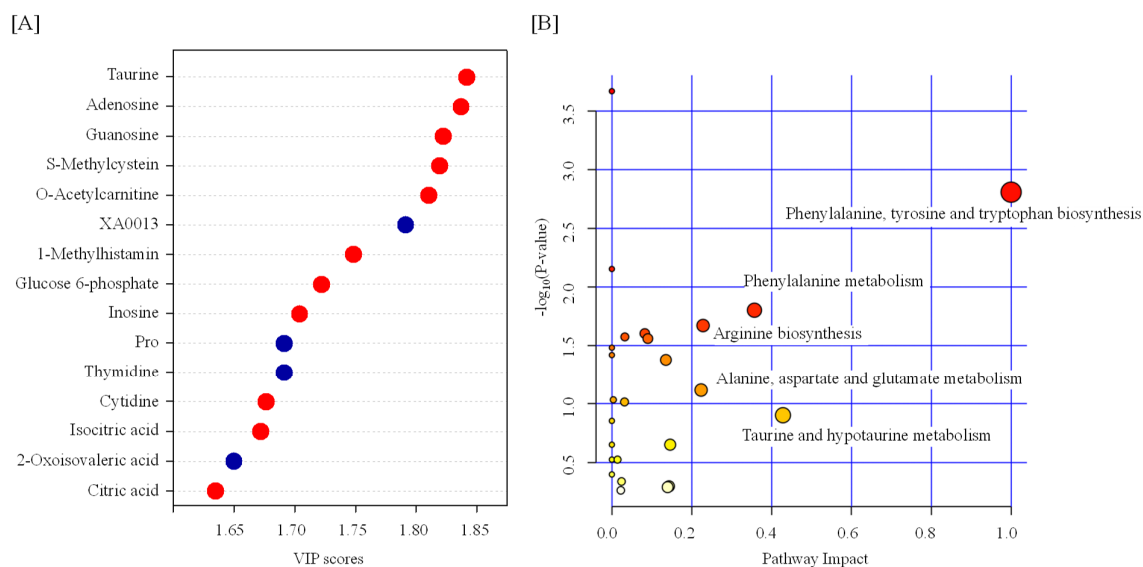

**Supplementary Figure S2.** Feature of metabolite in the serum from RP mice. [A] Variable Importance in Projection (VIP) scores of the partial least squares discriminant analysis (PLS-DA) in RP and control mice. The red and blue dots indicate the corresponding metabolite level was increased and decreased by RP, respectively. Proline, Pro. [B] A pathway analysis combining pathway enrichment and pathway topology analyses of metabolites whose levels were significantly changed by RP. The x-axis marks the pathway impact, and the y-axis represents the pathway enrichment. Each node marks a pathway, with larger sizes and darker colors representing higher pathway impact values and greater pathway enrichment.

**Supplementary Table S2.** List of RP-induced metabolite dysregulation.

| name                      | Fold Change | p.value  |
|---------------------------|-------------|----------|
| Taurine                   | 1.963       | 8.01E-05 |
| Adenosine                 | 10.966      | 0.000143 |
| Guanosine                 | 14.203      | 0.000462 |
| S-Methylcysteine          | 1.4762      | 0.000562 |
| O-Acetylcarnitine         | 1.4255      | 0.000864 |
| XA0013                    | 0.1097      | 0.001752 |
| 1-Methylhistamine         | 2.5439      | 0.004885 |
| Glucose 6-phosphate       | 2.3291      | 0.007551 |
| Inosine                   | 2.3113      | 0.009707 |
| Pro                       | 0.69504     | 0.011377 |
| Thymidine                 | 0.71233     | 0.011392 |
| Cytidine                  | 1.3316      | 0.013477 |
| Isocitric acid            | 1.2157      | 0.014173 |
| 2-Oxoisovaleric acid      | 0.82812     | 0.017704 |
| Citric acid               | 1.2452      | 0.020364 |
| Asp                       | 2.4375      | 0.023424 |
| Isethionic acid           | 1.5768      | 0.025191 |
| Tyr                       | 0.73504     | 0.029804 |
| N5-Ethylglutamine         | 1.6265      | 0.029831 |
| Ethanolamine<br>phosphate | 2.3659      | 0.031122 |
| Citrulline                | 0.75342     | 0.033472 |
| Phe                       | 0.73077     | 0.036946 |
| Trp                       | 0.83562     | 0.038103 |
| XA0035                    | 1.383       | 0.04049  |
| 1-Methyladenosine         | 1.4658      | 0.04112  |
| Uridine                   | 1.5854      | 0.041214 |

Probability means the P value determined by t-test. Data are represented as the ratio of peak area in RP to that in control. Proline, Pro; Aspartate, Asp; Tyrosine, Tyr; Phenylalanine, Phe; Tryptophan, Trp.

**Supplementary Table S3.** List of RP-induced metabolic pathway dysregulation.

| name                                                | Total(Hit) | -LOG <sub>10</sub> (p) | Impact  | Expected |
|-----------------------------------------------------|------------|------------------------|---------|----------|
| Phenylalanine, tyrosine and tryptophan biosynthesis | 4(2)       | 2.8812                 | 1       | 0.061089 |
| Aminoacyl-tRNA biosynthesis                         | 48(4)      | 2.2879                 | 0       | 0.73307  |
| Valine, leucine and isoleucine biosynthesis         | 8(2)       | 2.2284                 | 0       | 0.12218  |
| Phenylalanine metabolism                            | 12(2)      | 1.8722                 | 0.35714 | 0.18327  |
| Arginine biosynthesis                               | 14(2)      | 1.7407                 | 0.22843 | 0.21381  |
| Pyrimidine metabolism                               | 39(3)      | 1.7017                 | 0.0825  | 0.59562  |
| Histidine metabolism                                | 16(2)      | 1.6286                 | 0.09016 | 0.24436  |
| Neomycin, kanamycin and gentamicin biosynthesis     | 2(1)       | 1.5183                 | 0       | 0.030544 |
| Pantothenate and CoA biosynthesis                   | 19(2)      | 1.4869                 | 0       | 0.29017  |
| Citrate cycle (TCA cycle)                           | 20(2)      | 1.4451                 | 0.13536 | 0.30544  |
| Alanine, aspartate and glutamate metabolism         | 28(2)      | 1.1784                 | 0.22356 | 0.42762  |
| Purine metabolism                                   | 66(3)      | 1.1185                 | 0.00366 | 1.008    |
| Glyoxylate and dicarboxylate metabolism             | 32(2)      | 1.0763                 | 0.03175 | 0.48871  |
| Taurine and hypotaurine metabolism                  | 8(1)       | 0.93517                | 0.42857 | 0.12218  |
| Valine, leucine and isoleucine degradation          | 40(2)      | 0.91136                | 0.02168 | 0.61089  |
| Ubiquinone and other terpenoid-quinone biosynthesis | 9(1)       | 0.88716                | 0       | 0.13745  |
| Nicotinate and nicotinamide metabolism              | 15(1)      | 0.68402                | 0       | 0.22908  |
| Starch and sucrose metabolism                       | 15(1)      | 0.68402                | 0.14607 | 0.22908  |
| beta-Alanine metabolism                             | 21(1)      | 0.55636                | 0       | 0.32072  |
| Sphingolipid metabolism                             | 21(1)      | 0.55636                | 0.0142  | 0.32072  |
| Inositol phosphate metabolism                       | 30(1)      | 0.42871                | 0       | 0.45817  |
| Glycerophospholipid metabolism                      | 36(1)      | 0.36739                | 0.02423 | 0.5498   |
| Tryptophan metabolism                               | 41(1)      | 0.3256                 | 0.14305 | 0.62616  |
| Tyrosine metabolism                                 | 42(1)      | 0.31806                | 0.13972 | 0.64143  |
| Primary bile acid biosynthesis                      | 46(1)      | 0.29016                | 0.02239 | 0.70252  |
